# Supplementary material for: Structural characterization andin vitro–in vivoevaluation of effect of a polysaccharide fromSanguisorba officinalison acute kidney injury
Source: Royal Society of Chemistry journal article supplement (doi:10.1039/c9fo01891c), 2019-01-01
Supplement: c9fo01891c3.pdf [file c9fo01891c3.pdf]

| Monosaccharide | Ara /Rha | Gal      | Glc      | Gal-AC   |
|----------------|----------|----------|----------|----------|
| Mw             | 150.13   | 180.16   | 180.16   | 194.142  |
| RSP-3 (mol%)   | 22.15563 | 22.41464 | 34.00326 | 14.70499 |
