# Supplementary figures and images for: Structural characterization andin vitro–in vivoevaluation of effect of a polysaccharide fromSanguisorba officinalison acute kidney injury
Source: Royal Society of Chemistry journal article supplement (doi:10.1039/c9fo01891c), 2019-01-01

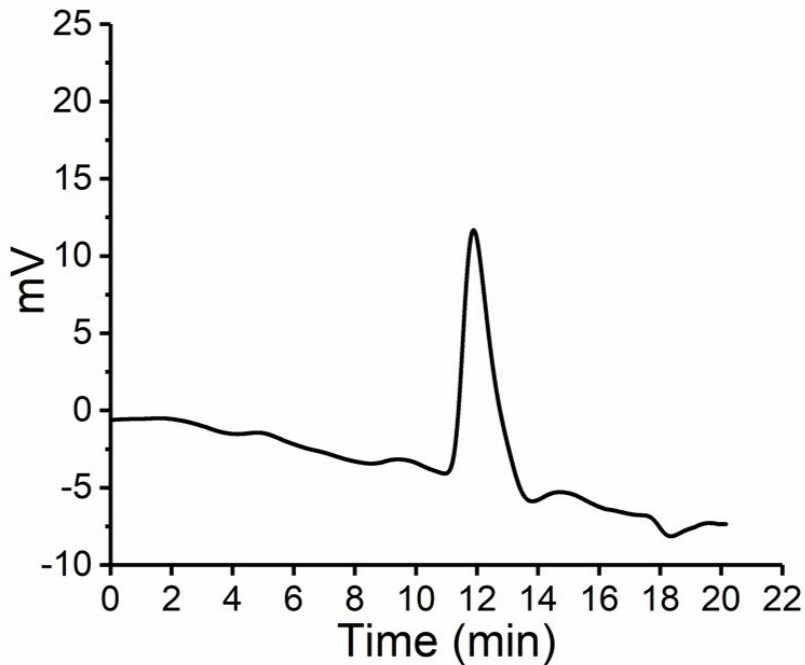

Supplement: c9fo01891c1.pdf [file c9fo01891c1.pdf]

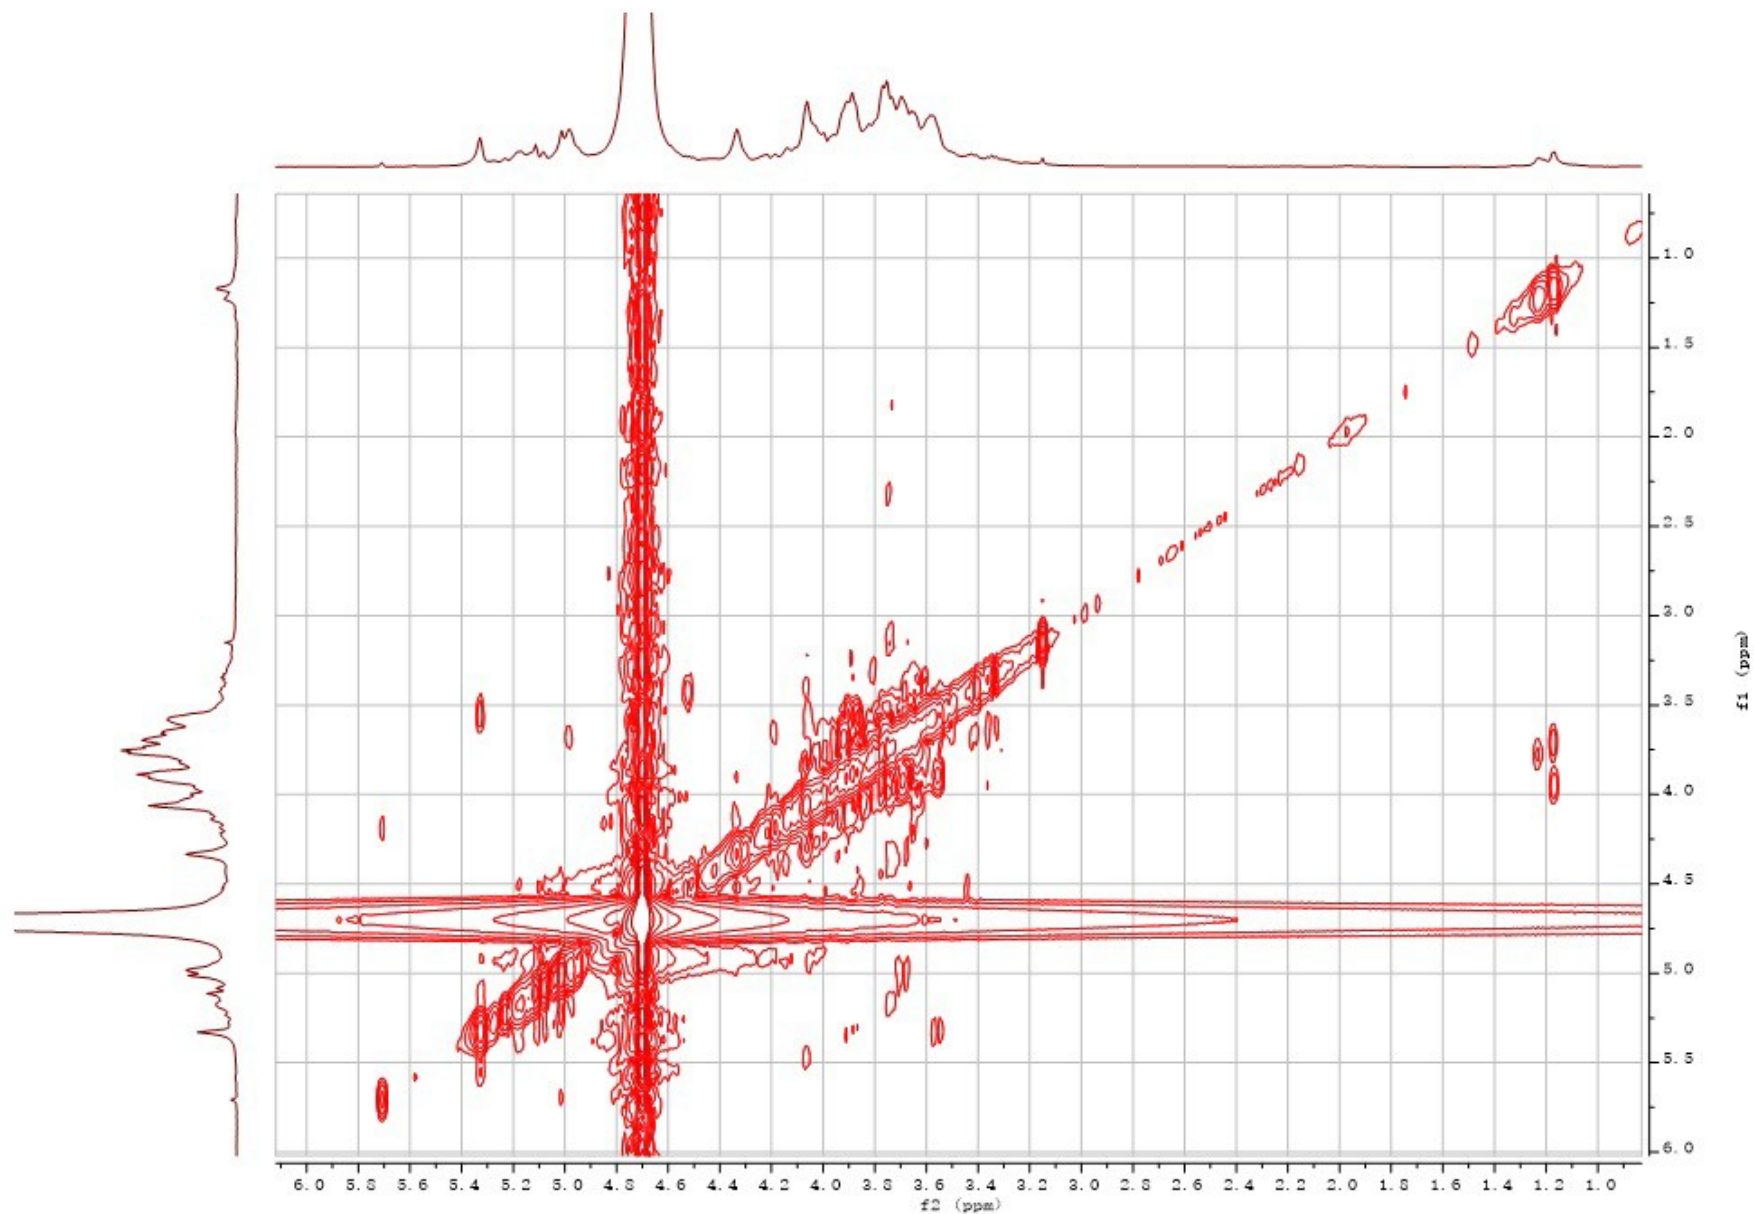

Supplement: c9fo01891c2.pdf [file c9fo01891c2.pdf]
